# Supplementary material
Source: publisher figshare collection journal article supplement (https://acs.figshare.com/ndownloader/files/7895944)
Supplement: Supplementary file 1 [file 7895944]

data_150105_lb509017_a
_audit_creation_date              2015-01-05
_audit_creation_method
;
Olex2 1.2
(compiled 2014.03.20 svn.r2914 for OlexSys, GUI svn.r4816)
;
_publ_contact_author_address      ?
_publ_contact_author_email        ?
_publ_contact_author_name         ''
_publ_contact_author_phone        ?
_publ_section_references
;
Dolomanov, O.V., Bourhis, L.J., Gildea, R.J, Howard, J.A.K. & Puschmann, H.
 (2009), J. Appl. Cryst. 42, 339-341.

Sheldrick, G.M. (2008). Acta Cryst. A64, 112-122.
;
_chemical_name_common             ?
_chemical_name_systematic
;
 ? 
;
_chemical_formula_moiety          'C21 H22 N2 O2 S'
_chemical_formula_sum             'C21 H22 N2 O2 S'
_chemical_formula_weight          366.47
_chemical_melting_point           ?
_chemical_oxdiff_formula          'c10 h10 n2 o8 S1'
loop_
  _atom_type_symbol
  _atom_type_description
  _atom_type_scat_dispersion_real
  _atom_type_scat_dispersion_imag
  _atom_type_scat_source
 'C' 'C' 0.0033 0.0016 'International Tables Vol C Tables 4.2.6.8 and 6.1.1.4'
 'H' 'H' 0.0000 0.0000 'International Tables Vol C Tables 4.2.6.8 and 6.1.1.4'
 'N' 'N' 0.0061 0.0033 'International Tables Vol C Tables 4.2.6.8 and 6.1.1.4'
 'O' 'O' 0.0106 0.0060 'International Tables Vol C Tables 4.2.6.8 and 6.1.1.4'
 'S' 'S' 0.1246 0.1234 'International Tables Vol C Tables 4.2.6.8 and 6.1.1.4'

_space_group_crystal_system       'monoclinic'
_space_group_IT_number            14
_space_group_name_H-M_alt         'P 1 21/n 1'
_space_group_name_Hall            '-P 2yn'
loop_
  _space_group_symop_id
  _space_group_symop_operation_xyz
 1 'x, y, z'
 2 '-x+1/2, y+1/2, -z+1/2'
 3 '-x, -y, -z'
 4 'x-1/2, -y-1/2, z-1/2'

_cell_length_a                    14.3337(6)
_cell_length_b                    6.8499(4)
_cell_length_c                    18.7839(8)
_cell_angle_alpha                 90.00
_cell_angle_beta                  95.751(4)
_cell_angle_gamma                 90.00
_cell_volume                      1835.02(14)
_cell_formula_units_Z             4
_cell_measurement_reflns_used     2754
_cell_measurement_temperature     174.7
_cell_measurement_theta_max       29.5210
_cell_measurement_theta_min       2.9678
_exptl_absorpt_coefficient_mu     0.194
_exptl_absorpt_correction_T_max   1.00000
_exptl_absorpt_correction_T_min   0.96569
_exptl_absorpt_correction_type    multi-scan
_exptl_absorpt_process_details
;
CrysAlisPro, Agilent Technologies,
Version 1.171.35.11 (release 16-05-2011 CrysAlis171 .NET)
(compiled May 16 2011,17:55:39)
Empirical absorption correction using spherical harmonics,
 implemented in SCALE3 ABSPACK scaling algorithm.
;
_exptl_crystal_colour             'light yellow'
_exptl_crystal_colour_modifier    light
_exptl_crystal_colour_primary     yellow
_exptl_crystal_density_diffrn     1.326
_exptl_crystal_density_meas       ?
_exptl_crystal_density_method     'not measured'
_exptl_crystal_description        block
_exptl_crystal_F_000              776
_exptl_crystal_size_max           0.3
_exptl_crystal_size_mid           0.26
_exptl_crystal_size_min           0.23
_exptl_special_details
;
 ? 
;
_diffrn_reflns_av_R_equivalents   0.0326
_diffrn_reflns_av_unetI/netI      0.0413
_diffrn_reflns_limit_h_max        17
_diffrn_reflns_limit_h_min        -17
_diffrn_reflns_limit_k_max        6
_diffrn_reflns_limit_k_min        -8
_diffrn_reflns_limit_l_max        22
_diffrn_reflns_limit_l_min        -17
_diffrn_reflns_number             6915
_diffrn_reflns_theta_full         25.35
_diffrn_reflns_theta_max          25.35
_diffrn_reflns_theta_min          3.17
_diffrn_ambient_temperature       174.7
_diffrn_detector_area_resol_mean  10.3592
_diffrn_measured_fraction_theta_full 0.997
_diffrn_measured_fraction_theta_max 0.997
_diffrn_measurement_device_type   'Xcalibur, Atlas, Gemini ultra'
_diffrn_measurement_method        '\w scans'
_diffrn_orient_matrix_UB_11       -0.0288663000
_diffrn_orient_matrix_UB_12       -0.0606151000
_diffrn_orient_matrix_UB_13       0.0191514000
_diffrn_orient_matrix_UB_21       0.0336519000
_diffrn_orient_matrix_UB_22       0.0041810000
_diffrn_orient_matrix_UB_23       0.0303336000
_diffrn_orient_matrix_UB_31       -0.0225349000
_diffrn_orient_matrix_UB_32       0.0839431000
_diffrn_orient_matrix_UB_33       0.0123118000
_diffrn_radiation_monochromator   graphite
_diffrn_radiation_type            MoK\a
_diffrn_radiation_wavelength      0.71073
_diffrn_source                    'Enhance (Mo) X-ray Source'
_diffrn_standards_decay_%         ?
_diffrn_standards_interval_count  ?
_diffrn_standards_interval_time   ?
_diffrn_standards_number          ?
_reflns_number_gt                 2761
_reflns_number_total              3351
_reflns_odcompleteness_completeness 99.58
_reflns_odcompleteness_iscentric  1
_reflns_odcompleteness_theta      26.32
_reflns_threshold_expression      >2sigma(I)
_computing_cell_refinement
;
CrysAlisPro, Agilent Technologies,
Version 1.171.35.11 (release 16-05-2011 CrysAlis171 .NET)
(compiled May 16 2011,17:55:39)
;
_computing_data_collection
;
CrysAlisPro, Agilent Technologies,
Version 1.171.35.11 (release 16-05-2011 CrysAlis171 .NET)
(compiled May 16 2011,17:55:39)
;
_computing_data_reduction
;
CrysAlisPro, Agilent Technologies,
Version 1.171.35.11 (release 16-05-2011 CrysAlis171 .NET)
(compiled May 16 2011,17:55:39)
;
_computing_molecular_graphics     'Olex2 (Dolomanov et al., 2009)'
_computing_publication_material   'Olex2 (Dolomanov et al., 2009)'
_computing_structure_refinement   'ShelXL (Sheldrick, 2008)'
_computing_structure_solution     'ShelXS (Sheldrick, 2008)'
_refine_diff_density_max          0.338
_refine_diff_density_min          -0.364
_refine_diff_density_rms          0.042
_refine_ls_extinction_coef        ?
_refine_ls_extinction_method      none
_refine_ls_goodness_of_fit_ref    1.048
_refine_ls_hydrogen_treatment     constr
_refine_ls_matrix_type            full
_refine_ls_number_parameters      238
_refine_ls_number_reflns          3351
_refine_ls_number_restraints      0
_refine_ls_R_factor_all           0.0506
_refine_ls_R_factor_gt            0.0388
_refine_ls_restrained_S_all       1.048
_refine_ls_shift/su_max           0.000
_refine_ls_shift/su_mean          0.000
_refine_ls_structure_factor_coef  Fsqd
_refine_ls_weighting_details
'calc w=1/[\s^2^(Fo^2^)+(0.0415P)^2^+0.7017P] where P=(Fo^2^+2Fc^2^)/3'
_refine_ls_weighting_scheme       calc
_refine_ls_wR_factor_gt           0.0953
_refine_ls_wR_factor_ref          0.1036
_refine_special_details
;
 Refinement of F^2^ against ALL reflections.  The weighted R-factor wR and 
 goodness of fit S are based on F^2^, conventional R-factors R are based 
 on F, with F set to zero for negative F^2^. The threshold expression of 
 F^2^ > 2sigma(F^2^) is used only for calculating R-factors(gt) etc. and is 
 not relevant to the choice of reflections for refinement.  R-factors based 
 on F^2^ are statistically about twice as large as those based on F, and R- 
 factors based on ALL data will be even larger. 
;
_olex2_refinement_description
;
1. Fixed Uiso
 At 1.2 times of:
  All C(H) groups, All C(H,H) groups
 At 1.5 times of:
  All C(H,H,H) groups
2.a Secondary CH2 refined with riding coordinates:
 C9(H9A,H9B), C12(H12A,H12B)
2.b Aromatic/amide H refined with riding coordinates:
 C2(H2), C3(H3), C4(H4), C5(H5), C10(H10), C16(H16), C17(H17), C19(H19),
 C20(H20)
2.c Idealised Me refined as rotating group:
 C13(H13A,H13B,H13C), C14(H14A,H14B,H14C), C21(H21A,H21B,H21C)
;
_atom_sites_solution_hydrogens    geom
_atom_sites_solution_primary      direct
_atom_sites_solution_secondary    difmap
loop_
  _atom_site_label
  _atom_site_type_symbol
  _atom_site_fract_x
  _atom_site_fract_y
  _atom_site_fract_z
  _atom_site_U_iso_or_equiv
  _atom_site_adp_type
  _atom_site_occupancy
  _atom_site_calc_flag
  _atom_site_disorder_assembly
  _atom_site_disorder_group
  _atom_site_refinement_flags_posn
 S1 S 0.37587(3) 0.66575(8) 0.07487(2) 0.03241(16) Uani 1 d . . .
 O1 O 0.44768(9) 0.5405(2) 0.10720(7) 0.0479(4) Uani 1 d . . .
 O2 O 0.39268(9) 0.8701(2) 0.06767(7) 0.0405(4) Uani 1 d . . .
 N1 N 0.34860(10) 0.5825(2) -0.00613(8) 0.0275(3) Uani 1 d . . .
 N2 N 0.31735(10) 0.8274(2) -0.09875(7) 0.0254(3) Uani 1 d . . .
 C1 C 0.24220(13) 0.8839(3) -0.14555(9) 0.0280(4) Uani 1 d . . .
 C2 C 0.23763(16) 1.0127(3) -0.20312(11) 0.0411(5) Uani 1 d . . .
 H2 H 0.2909 1.0856 -0.2136 0.049 Uiso 1 calc . . R
 C3 C 0.15342(17) 1.0306(3) -0.24409(12) 0.0509(6) Uani 1 d . . .
 H3 H 0.1490 1.1146 -0.2845 0.061 Uiso 1 calc . . R
 C4 C 0.07372(16) 0.9280(3) -0.22782(11) 0.0470(6) Uani 1 d . . .
 H4 H 0.0165 0.9433 -0.2575 0.056 Uiso 1 calc . . R
 C5 C 0.07687(14) 0.8063(3) -0.16992(10) 0.0361(5) Uani 1 d . . .
 H5 H 0.0220 0.7408 -0.1582 0.043 Uiso 1 calc . . R
 C6 C 0.16273(13) 0.7798(3) -0.12807(9) 0.0271(4) Uani 1 d . . .
 C7 C 0.19168(12) 0.6571(3) -0.06882(9) 0.0256(4) Uani 1 d . . .
 C8 C 0.28510(12) 0.6896(2) -0.05338(9) 0.0233(4) Uani 1 d . . .
 C9 C 0.34929(13) 0.3696(3) -0.01993(11) 0.0336(4) Uani 1 d . . .
 H9A H 0.3992 0.3107 0.0136 0.040 Uiso 1 calc . . R
 H9B H 0.3673 0.3495 -0.0689 0.040 Uiso 1 calc . . R
 C10 C 0.26029(14) 0.2581(3) -0.01348(10) 0.0324(4) Uani 1 d . . .
 H10 H 0.2697 0.1229 -0.0040 0.039 Uiso 1 calc . . R
 C11 C 0.17135(13) 0.3125(3) -0.01856(9) 0.0297(4) Uani 1 d . . .
 C12 C 0.13248(12) 0.5146(3) -0.03297(10) 0.0318(4) Uani 1 d . . .
 H12A H 0.0719 0.5017 -0.0629 0.038 Uiso 1 calc . . R
 H12B H 0.1189 0.5717 0.0133 0.038 Uiso 1 calc . . R
 C13 C 0.41334(12) 0.8935(3) -0.09933(10) 0.0328(4) Uani 1 d . . .
 H13A H 0.4322 0.9659 -0.0552 0.049 Uiso 1 calc . . GR
 H13B H 0.4181 0.9789 -0.1407 0.049 Uiso 1 calc . . GR
 H13C H 0.4546 0.7805 -0.1025 0.049 Uiso 1 calc . . GR
 C14 C 0.09570(15) 0.1656(3) -0.00816(13) 0.0458(5) Uani 1 d . . .
 H14A H 0.1238 0.0357 -0.0010 0.069 Uiso 1 calc . . GR
 H14B H 0.0500 0.1639 -0.0506 0.069 Uiso 1 calc . . GR
 H14C H 0.0641 0.2014 0.0339 0.069 Uiso 1 calc . . GR
 C15 C 0.27761(12) 0.6420(3) 0.12337(9) 0.0312(4) Uani 1 d . . .
 C16 C 0.21783(14) 0.7991(3) 0.12782(10) 0.0375(5) Uani 1 d . . .
 H16 H 0.2288 0.9182 0.1041 0.045 Uiso 1 calc . . R
 C17 C 0.14183(15) 0.7804(3) 0.16731(11) 0.0423(5) Uani 1 d . . .
 H17 H 0.0999 0.8871 0.1698 0.051 Uiso 1 calc . . R
 C18 C 0.12580(14) 0.6087(3) 0.20333(10) 0.0410(5) Uani 1 d . . .
 C19 C 0.18551(15) 0.4531(3) 0.19679(11) 0.0432(5) Uani 1 d . . .
 H19 H 0.1743 0.3335 0.2201 0.052 Uiso 1 calc . . R
 C20 C 0.26140(14) 0.4677(3) 0.15697(10) 0.0390(5) Uani 1 d . . .
 H20 H 0.3018 0.3592 0.1528 0.047 Uiso 1 calc . . R
 C21 C 0.04706(17) 0.5955(4) 0.25034(13) 0.0567(6) Uani 1 d . . .
 H21A H 0.0545 0.6979 0.2869 0.085 Uiso 1 calc . . GR
 H21B H 0.0484 0.4673 0.2736 0.085 Uiso 1 calc . . GR
 H21C H -0.0130 0.6128 0.2212 0.085 Uiso 1 calc . . GR

loop_
  _atom_site_aniso_label
  _atom_site_aniso_U_11
  _atom_site_aniso_U_22
  _atom_site_aniso_U_33
  _atom_site_aniso_U_23
  _atom_site_aniso_U_13
  _atom_site_aniso_U_12
 S1 0.0216(2) 0.0500(3) 0.0253(3) 0.0010(2) 0.00028(18) -0.0010(2)
 O1 0.0266(7) 0.0791(11) 0.0367(8) 0.0080(8) -0.0041(6) 0.0113(7)
 O2 0.0356(8) 0.0509(9) 0.0351(7) -0.0087(6) 0.0048(6) -0.0139(7)
 N1 0.0220(7) 0.0336(8) 0.0269(8) 0.0019(7) 0.0026(6) 0.0045(7)
 N2 0.0241(7) 0.0277(8) 0.0250(7) 0.0000(6) 0.0062(6) -0.0013(6)
 C1 0.0331(10) 0.0265(9) 0.0245(9) -0.0006(8) 0.0039(7) 0.0022(8)
 C2 0.0480(12) 0.0380(11) 0.0380(11) 0.0104(9) 0.0079(9) -0.0008(10)
 C3 0.0617(15) 0.0506(14) 0.0393(12) 0.0210(11) 0.0004(11) 0.0064(12)
 C4 0.0455(12) 0.0536(14) 0.0391(12) 0.0114(10) -0.0093(10) 0.0093(11)
 C5 0.0330(10) 0.0383(11) 0.0355(11) 0.0034(9) -0.0045(8) 0.0026(9)
 C6 0.0285(9) 0.0261(9) 0.0264(9) -0.0003(7) 0.0011(7) 0.0018(8)
 C7 0.0245(9) 0.0275(9) 0.0249(9) 0.0004(7) 0.0028(7) 0.0005(8)
 C8 0.0244(9) 0.0256(9) 0.0204(8) -0.0004(7) 0.0046(7) 0.0026(7)
 C9 0.0315(10) 0.0336(10) 0.0363(10) 0.0031(8) 0.0065(8) 0.0103(9)
 C10 0.0423(11) 0.0259(10) 0.0299(9) 0.0016(8) 0.0074(8) 0.0039(9)
 C11 0.0357(10) 0.0273(9) 0.0264(9) 0.0006(8) 0.0039(8) -0.0026(8)
 C12 0.0251(9) 0.0355(11) 0.0351(10) 0.0055(9) 0.0039(8) -0.0022(8)
 C13 0.0280(9) 0.0368(11) 0.0353(10) -0.0008(9) 0.0109(8) -0.0054(9)
 C14 0.0449(13) 0.0327(11) 0.0605(14) 0.0038(10) 0.0081(11) -0.0077(10)
 C15 0.0263(9) 0.0457(12) 0.0216(9) 0.0024(8) 0.0018(7) 0.0002(9)
 C16 0.0375(11) 0.0425(12) 0.0334(10) 0.0024(9) 0.0079(9) 0.0004(10)
 C17 0.0373(11) 0.0492(13) 0.0418(11) -0.0032(10) 0.0111(9) 0.0044(10)
 C18 0.0381(11) 0.0547(13) 0.0316(11) -0.0069(10) 0.0102(9) -0.0100(10)
 C19 0.0483(13) 0.0483(13) 0.0339(11) 0.0062(10) 0.0090(9) -0.0059(11)
 C20 0.0391(11) 0.0459(12) 0.0322(10) 0.0060(9) 0.0048(9) 0.0068(10)
 C21 0.0549(14) 0.0651(16) 0.0548(14) -0.0123(12) 0.0297(12) -0.0151(13)

_geom_special_details
;
 All esds (except the esd in the dihedral angle between two l.s. planes) 
 are estimated using the full covariance matrix.  The cell esds are taken 
 into account individually in the estimation of esds in distances, angles 
 and torsion angles; correlations between esds in cell parameters are only 
 used when they are defined by crystal symmetry.  An approximate (isotropic) 
 treatment of cell esds is used for estimating esds involving l.s. planes. 
;
loop_
  _geom_bond_atom_site_label_1
  _geom_bond_atom_site_label_2
  _geom_bond_distance
  _geom_bond_site_symmetry_2
  _geom_bond_publ_flag
 S1 O1 1.4281(14) . ?
 S1 O2 1.4291(15) . ?
 S1 N1 1.6350(15) . ?
 S1 C15 1.7600(19) . ?
 N1 C8 1.411(2) . ?
 N1 C9 1.482(2) . ?
 N2 C1 1.376(2) . ?
 N2 C8 1.382(2) . ?
 N2 C13 1.450(2) . ?
 C1 C2 1.392(3) . ?
 C1 C6 1.410(3) . ?
 C2 H2 0.9500 . ?
 C2 C3 1.370(3) . ?
 C3 H3 0.9500 . ?
 C3 C4 1.401(3) . ?
 C4 H4 0.9500 . ?
 C4 C5 1.368(3) . ?
 C5 H5 0.9500 . ?
 C5 C6 1.404(3) . ?
 C6 C7 1.423(2) . ?
 C7 C8 1.360(2) . ?
 C7 C12 1.497(2) . ?
 C9 H9A 0.9900 . ?
 C9 H9B 0.9900 . ?
 C9 C10 1.502(3) . ?
 C10 H10 0.9500 . ?
 C10 C11 1.323(3) . ?
 C11 C12 1.506(3) . ?
 C11 C14 1.507(3) . ?
 C12 H12A 0.9900 . ?
 C12 H12B 0.9900 . ?
 C13 H13A 0.9800 . ?
 C13 H13B 0.9800 . ?
 C13 H13C 0.9800 . ?
 C14 H14A 0.9800 . ?
 C14 H14B 0.9800 . ?
 C14 H14C 0.9800 . ?
 C15 C16 1.383(3) . ?
 C15 C20 1.381(3) . ?
 C16 H16 0.9500 . ?
 C16 C17 1.384(3) . ?
 C17 H17 0.9500 . ?
 C17 C18 1.387(3) . ?
 C18 C19 1.380(3) . ?
 C18 C21 1.504(3) . ?
 C19 H19 0.9500 . ?
 C19 C20 1.384(3) . ?
 C20 H20 0.9500 . ?
 C21 H21A 0.9800 . ?
 C21 H21B 0.9800 . ?
 C21 H21C 0.9800 . ?

loop_
  _geom_angle_atom_site_label_1
  _geom_angle_atom_site_label_2
  _geom_angle_atom_site_label_3
  _geom_angle
  _geom_angle_site_symmetry_1
  _geom_angle_site_symmetry_3
  _geom_angle_publ_flag
 O1 S1 O2 120.51(9) . . ?
 O1 S1 N1 106.33(8) . . ?
 O1 S1 C15 107.72(9) . . ?
 O2 S1 N1 106.28(8) . . ?
 O2 S1 C15 106.89(9) . . ?
 N1 S1 C15 108.69(8) . . ?
 C8 N1 S1 118.89(12) . . ?
 C8 N1 C9 114.62(14) . . ?
 C9 N1 S1 120.05(12) . . ?
 C1 N2 C8 107.29(14) . . ?
 C1 N2 C13 126.18(15) . . ?
 C8 N2 C13 126.46(15) . . ?
 N2 C1 C2 130.35(18) . . ?
 N2 C1 C6 107.94(15) . . ?
 C2 C1 C6 121.67(17) . . ?
 C1 C2 H2 121.2 . . ?
 C3 C2 C1 117.6(2) . . ?
 C3 C2 H2 121.2 . . ?
 C2 C3 H3 119.2 . . ?
 C2 C3 C4 121.63(19) . . ?
 C4 C3 H3 119.2 . . ?
 C3 C4 H4 119.4 . . ?
 C5 C4 C3 121.11(19) . . ?
 C5 C4 H4 119.4 . . ?
 C4 C5 H5 120.6 . . ?
 C4 C5 C6 118.76(19) . . ?
 C6 C5 H5 120.6 . . ?
 C1 C6 C7 107.56(15) . . ?
 C5 C6 C1 119.17(16) . . ?
 C5 C6 C7 133.22(17) . . ?
 C6 C7 C12 127.08(16) . . ?
 C8 C7 C6 105.90(15) . . ?
 C8 C7 C12 126.96(16) . . ?
 N2 C8 N1 120.54(15) . . ?
 C7 C8 N1 127.47(16) . . ?
 C7 C8 N2 111.30(15) . . ?
 N1 C9 H9A 107.9 . . ?
 N1 C9 H9B 107.9 . . ?
 N1 C9 C10 117.76(15) . . ?
 H9A C9 H9B 107.2 . . ?
 C10 C9 H9A 107.9 . . ?
 C10 C9 H9B 107.9 . . ?
 C9 C10 H10 113.9 . . ?
 C11 C10 C9 132.14(17) . . ?
 C11 C10 H10 113.9 . . ?
 C10 C11 C12 127.49(17) . . ?
 C10 C11 C14 120.21(17) . . ?
 C12 C11 C14 112.29(16) . . ?
 C7 C12 C11 117.64(15) . . ?
 C7 C12 H12A 107.9 . . ?
 C7 C12 H12B 107.9 . . ?
 C11 C12 H12A 107.9 . . ?
 C11 C12 H12B 107.9 . . ?
 H12A C12 H12B 107.2 . . ?
 N2 C13 H13A 109.5 . . ?
 N2 C13 H13B 109.5 . . ?
 N2 C13 H13C 109.5 . . ?
 H13A C13 H13B 109.5 . . ?
 H13A C13 H13C 109.5 . . ?
 H13B C13 H13C 109.5 . . ?
 C11 C14 H14A 109.5 . . ?
 C11 C14 H14B 109.5 . . ?
 C11 C14 H14C 109.5 . . ?
 H14A C14 H14B 109.5 . . ?
 H14A C14 H14C 109.5 . . ?
 H14B C14 H14C 109.5 . . ?
 C16 C15 S1 119.48(15) . . ?
 C20 C15 S1 119.76(15) . . ?
 C20 C15 C16 120.76(18) . . ?
 C15 C16 H16 120.5 . . ?
 C15 C16 C17 119.08(19) . . ?
 C17 C16 H16 120.5 . . ?
 C16 C17 H17 119.4 . . ?
 C16 C17 C18 121.2(2) . . ?
 C18 C17 H17 119.4 . . ?
 C17 C18 C21 120.5(2) . . ?
 C19 C18 C17 118.49(19) . . ?
 C19 C18 C21 120.9(2) . . ?
 C18 C19 H19 119.3 . . ?
 C18 C19 C20 121.3(2) . . ?
 C20 C19 H19 119.3 . . ?
 C15 C20 C19 119.1(2) . . ?
 C15 C20 H20 120.4 . . ?
 C19 C20 H20 120.4 . . ?
 C18 C21 H21A 109.5 . . ?
 C18 C21 H21B 109.5 . . ?
 C18 C21 H21C 109.5 . . ?
 H21A C21 H21B 109.5 . . ?
 H21A C21 H21C 109.5 . . ?
 H21B C21 H21C 109.5 . . ?

loop_
  _geom_torsion_atom_site_label_1
  _geom_torsion_atom_site_label_2
  _geom_torsion_atom_site_label_3
  _geom_torsion_atom_site_label_4
  _geom_torsion
  _geom_torsion_site_symmetry_1
  _geom_torsion_site_symmetry_2
  _geom_torsion_site_symmetry_3
  _geom_torsion_site_symmetry_4
  _geom_torsion_publ_flag
 S1 N1 C8 N2 92.01(17) . . . . ?
 S1 N1 C8 C7 -98.3(2) . . . . ?
 S1 N1 C9 C10 89.61(18) . . . . ?
 S1 C15 C16 C17 -178.67(15) . . . . ?
 S1 C15 C20 C19 177.98(15) . . . . ?
 O1 S1 N1 C8 -174.04(13) . . . . ?
 O1 S1 N1 C9 35.62(16) . . . . ?
 O1 S1 C15 C16 149.76(15) . . . . ?
 O1 S1 C15 C20 -29.76(18) . . . . ?
 O2 S1 N1 C8 -44.49(15) . . . . ?
 O2 S1 N1 C9 165.17(13) . . . . ?
 O2 S1 C15 C16 18.91(17) . . . . ?
 O2 S1 C15 C20 -160.61(15) . . . . ?
 N1 S1 C15 C16 -95.43(16) . . . . ?
 N1 S1 C15 C20 85.06(16) . . . . ?
 N1 C9 C10 C11 23.7(3) . . . . ?
 N2 C1 C2 C3 175.3(2) . . . . ?
 N2 C1 C6 C5 -177.75(16) . . . . ?
 N2 C1 C6 C7 0.0(2) . . . . ?
 C1 N2 C8 N1 170.53(15) . . . . ?
 C1 N2 C8 C7 -0.7(2) . . . . ?
 C1 C2 C3 C4 1.9(3) . . . . ?
 C1 C6 C7 C8 -0.4(2) . . . . ?
 C1 C6 C7 C12 -177.82(17) . . . . ?
 C2 C1 C6 C5 0.2(3) . . . . ?
 C2 C1 C6 C7 177.92(17) . . . . ?
 C2 C3 C4 C5 0.3(4) . . . . ?
 C3 C4 C5 C6 -2.3(3) . . . . ?
 C4 C5 C6 C1 2.0(3) . . . . ?
 C4 C5 C6 C7 -175.0(2) . . . . ?
 C5 C6 C7 C8 176.9(2) . . . . ?
 C5 C6 C7 C12 -0.6(3) . . . . ?
 C6 C1 C2 C3 -2.1(3) . . . . ?
 C6 C7 C8 N1 -169.81(16) . . . . ?
 C6 C7 C8 N2 0.7(2) . . . . ?
 C6 C7 C12 C11 132.48(19) . . . . ?
 C8 N1 C9 C10 -61.9(2) . . . . ?
 C8 N2 C1 C2 -177.27(19) . . . . ?
 C8 N2 C1 C6 0.44(19) . . . . ?
 C8 C7 C12 C11 -44.4(3) . . . . ?
 C9 N1 C8 N2 -116.10(18) . . . . ?
 C9 N1 C8 C7 53.6(2) . . . . ?
 C9 C10 C11 C12 -0.2(3) . . . . ?
 C9 C10 C11 C14 -178.95(19) . . . . ?
 C10 C11 C12 C7 22.0(3) . . . . ?
 C12 C7 C8 N1 7.6(3) . . . . ?
 C12 C7 C8 N2 178.12(17) . . . . ?
 C13 N2 C1 C2 0.0(3) . . . . ?
 C13 N2 C1 C6 177.69(16) . . . . ?
 C13 N2 C8 N1 -6.7(3) . . . . ?
 C13 N2 C8 C7 -177.95(16) . . . . ?
 C14 C11 C12 C7 -159.13(17) . . . . ?
 C15 S1 N1 C8 70.24(15) . . . . ?
 C15 S1 N1 C9 -80.10(15) . . . . ?
 C15 C16 C17 C18 1.2(3) . . . . ?
 C16 C15 C20 C19 -1.5(3) . . . . ?
 C16 C17 C18 C19 -2.4(3) . . . . ?
 C16 C17 C18 C21 175.5(2) . . . . ?
 C17 C18 C19 C20 1.7(3) . . . . ?
 C18 C19 C20 C15 0.2(3) . . . . ?
 C20 C15 C16 C17 0.8(3) . . . . ?
 C21 C18 C19 C20 -176.21(19) . . . . ?
